# Supplementary material
Source: PubMed Central journal article supplement (PMC3422562)
Supplement: NIHMS392417-supplement-SI_with_figures.pdf [file NIHMS392417-supplement-SI_with_figures.pdf]

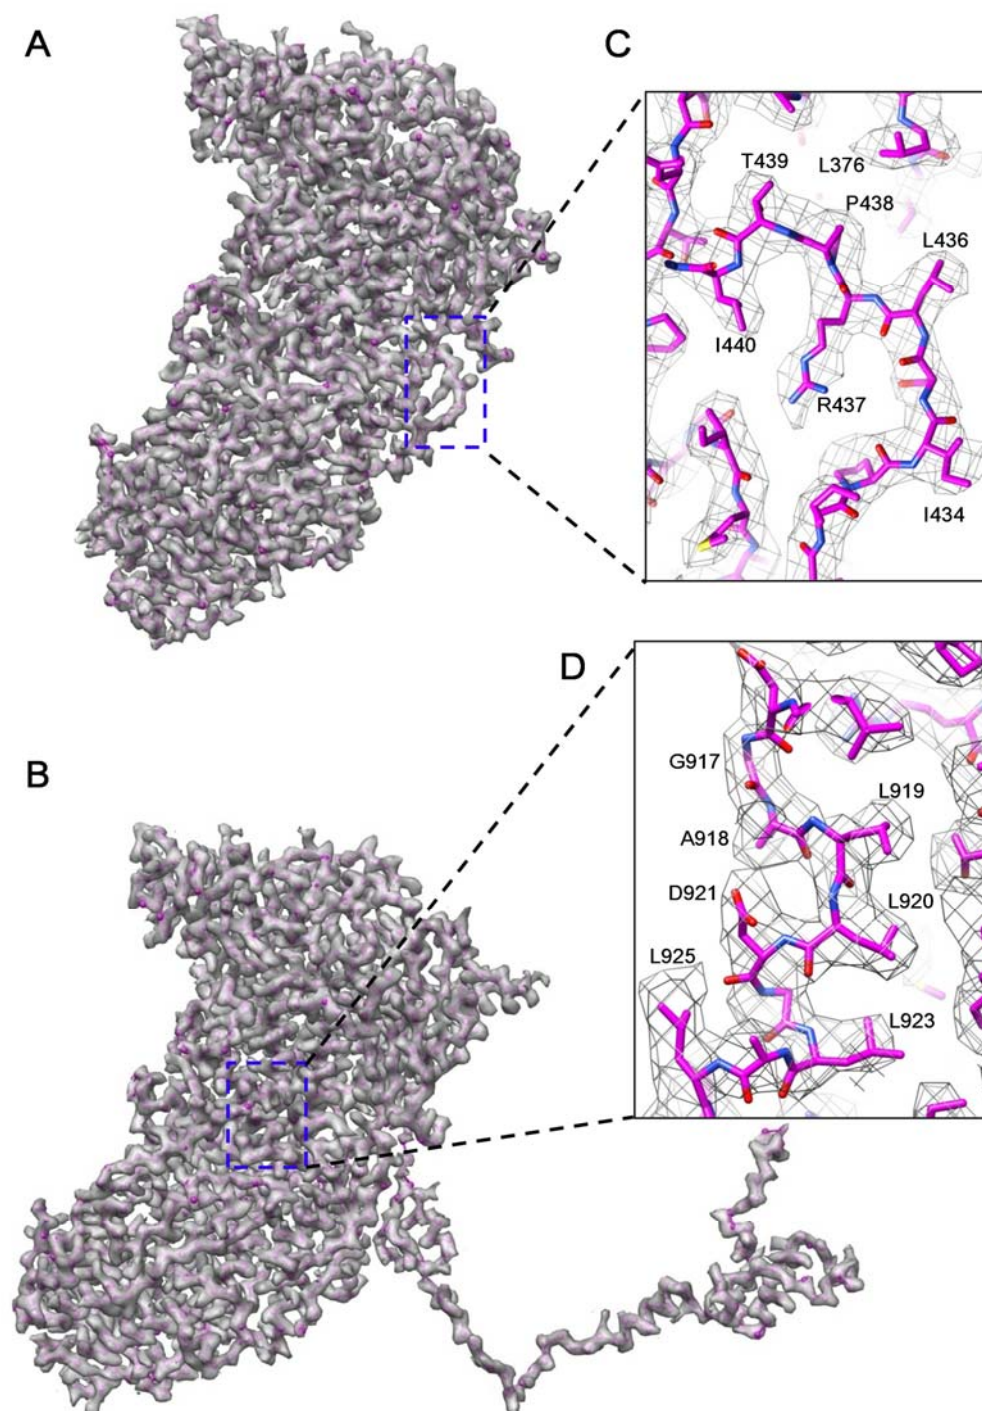

**Figure S1. CryoEM Density of VP3 Monomers with their Atomic Models Superimposed**

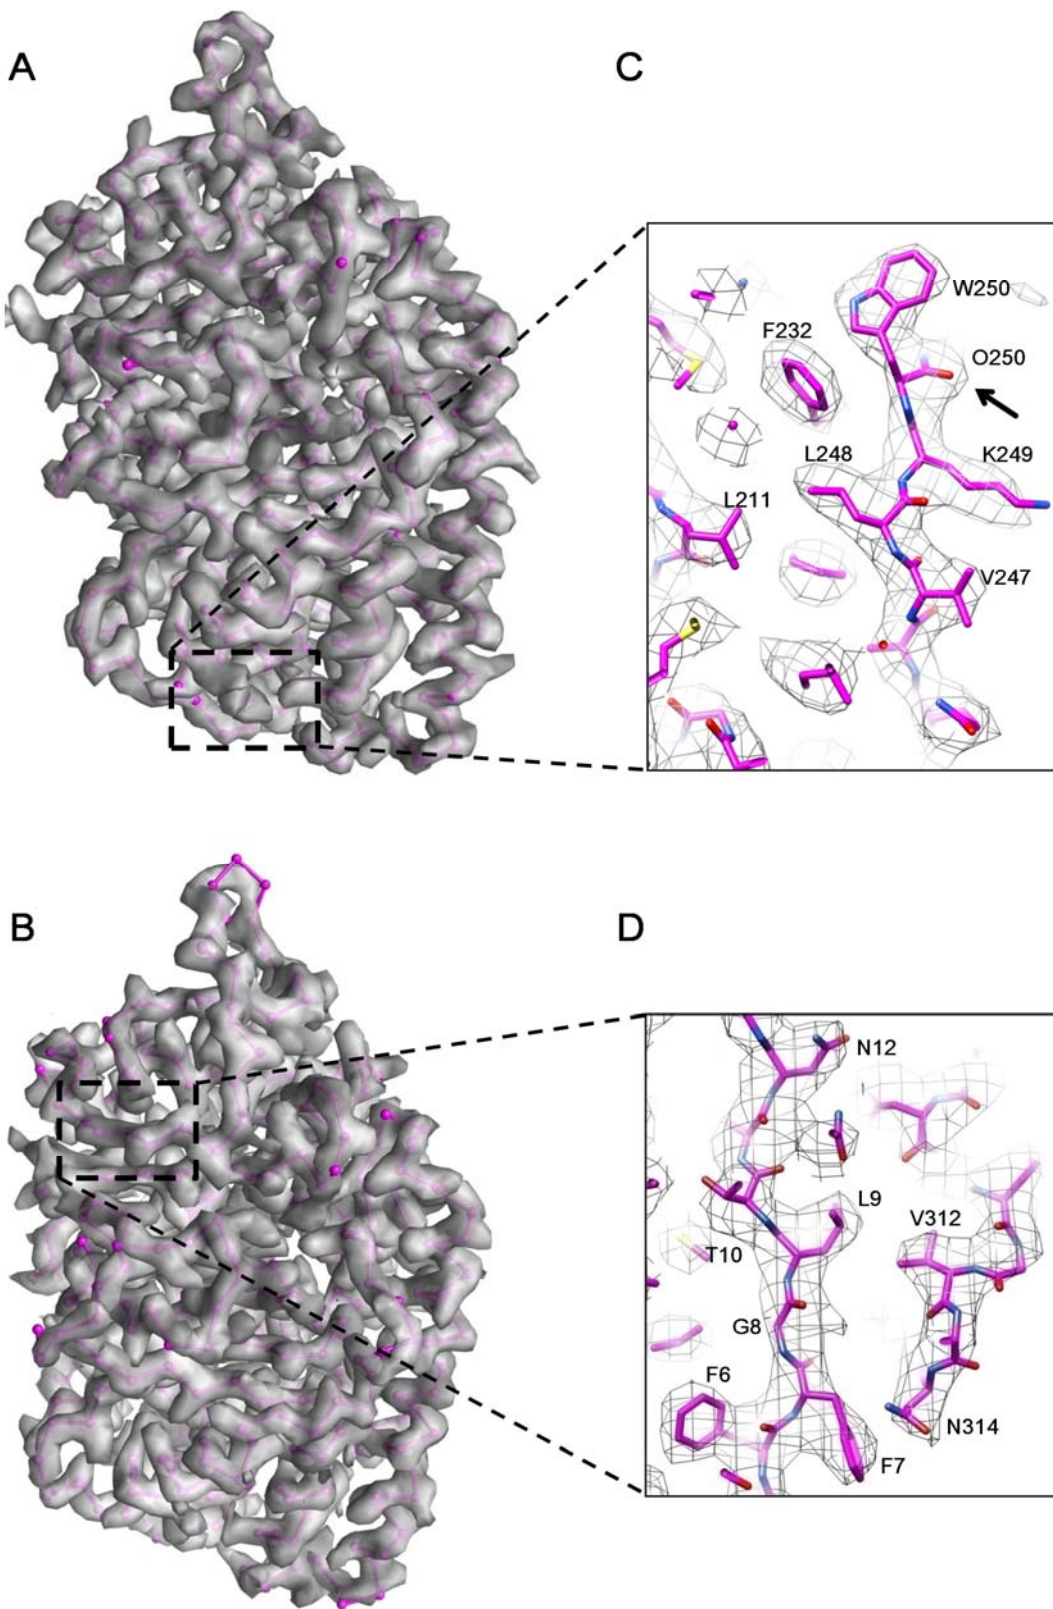

**Figure S2. CryoEM Density of VP6 Monomers with their Atomic Models Superimposed**

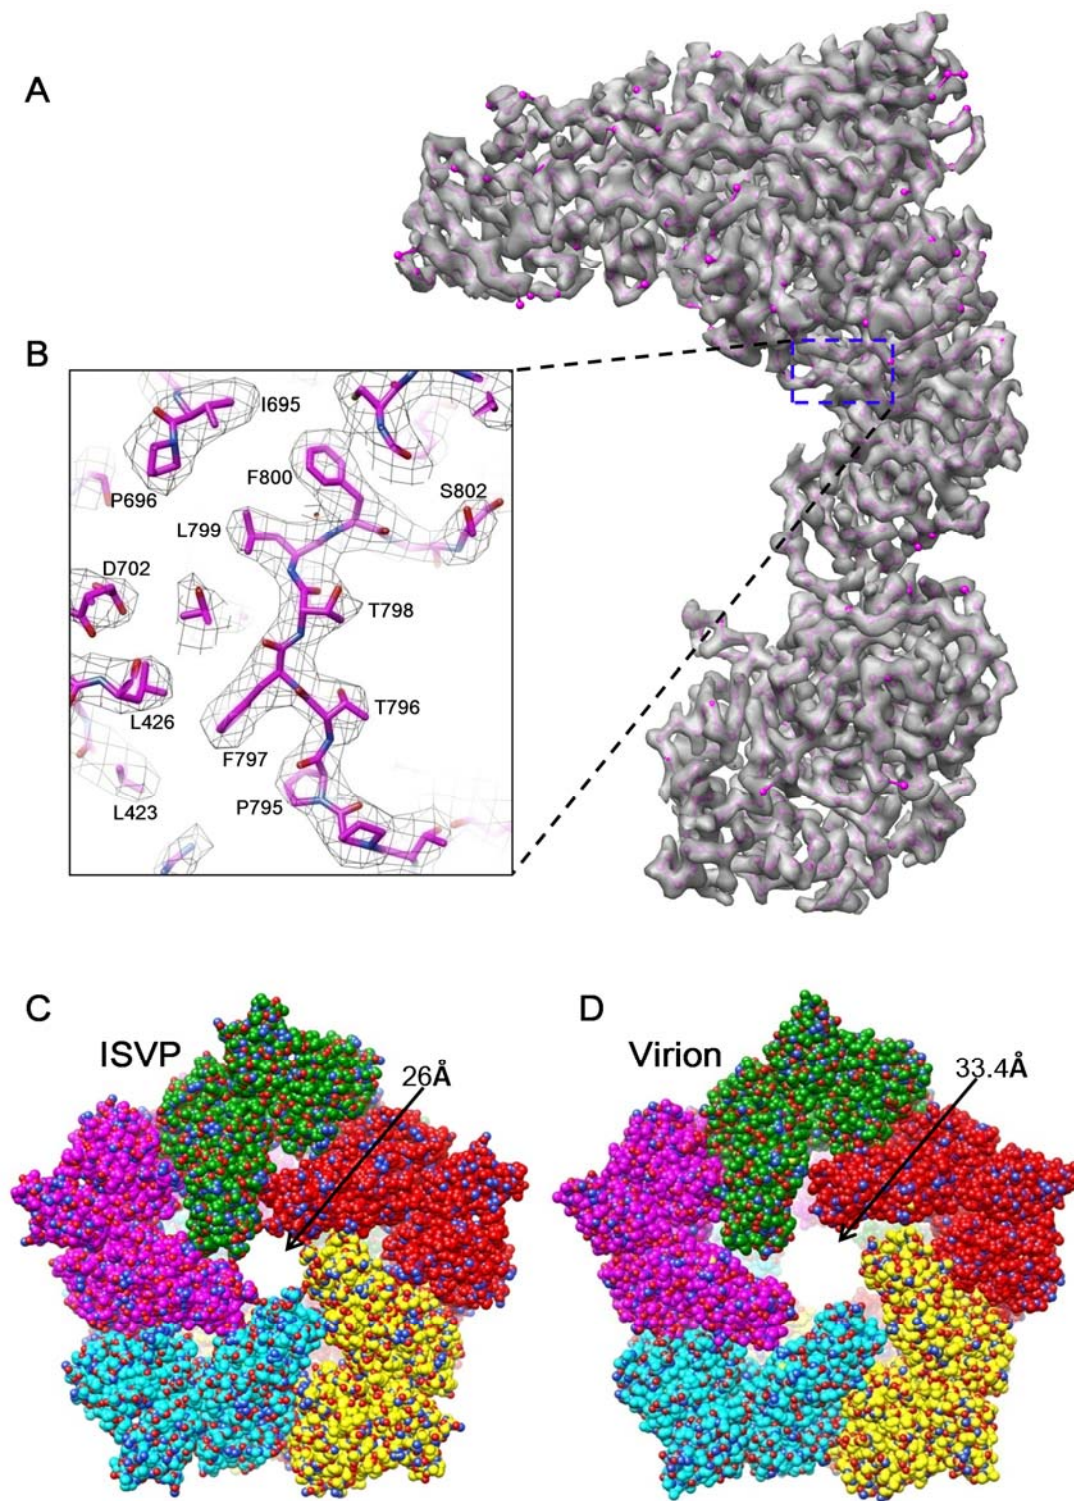

**Figure S3. CryoEM Structure of the Turret Protein VP1**

903  
904

905 **Supplemental Figure Legends**

906 **Figure S1.** CryoEM Density of VP3 Monomers with their Atomic Models Superimposed, related to  
907 Figure 1

908 (A) and (B) Overall structures of VP3A and VP3B cryoEM densities (gray mesh) with their atomic  
909 models (pink, only backbone is shown) superimposed.

910 (C) and (D) Side chain densities (gray mesh) of VP3A and VP3B with atomic models (pink)  
911 superimposed. See also Movies S2.

912

913 **Figure S2.** CryoEM Density of VP6 Monomers with their Atomic Models Superimposed, related to  
914 Figure 2

915 (A) and (B) Overall structures of VP6A and VP6B cryoEM densities (gray mesh) with their atomic  
916 models (pink, only backbone is shown) superimposed.

917 (C) and (D) Side chain densities (gray mesh) of VP6A and VP6B with atomic models (pink)  
918 superimposed. The density for a carboxyl oxygen is also indicated by an arrow in (C). See also Movies  
919 S2.

920

921 **Figure S3.** CryoEM Structure of the Turret Protein VP1, related to Figure 2

922 (A) Overall structure of VP1 with its atomic model (pink, only backbone is shown) superimposed.

923 (B) Side chain densities (gray mesh) of VP1 with its atomic models (pink) superimposed. See also  
924 Movie S2.

925 (C) and (D) The space-filling models of VP1 pentamers, showing changing of the VP5 channel  
926 (diameter of 26Å in ISVP and 33Å in virion). See also Movies S2.

927

928 **Supplemental Movie Legends:**

929 **Movie S1.** Shaded Surface Representation of the Aquareovirus ISVP Reconstruction at 3.3 Å

930 Resolution, related to Figure 1. The map is color-coded according to radius, as that in Figure 1C. An

931 icosahedron is included to facilitate identification of symmetry axes.

932

933 **Movie S2.** Mesh Surface Representation of cryo-EM densities, related to Figure 2.

934 Part A: a  $\alpha$  helix from the VP3A Protein with its atomic model (magenta) superimposed. All the side  
935 chain densities of this helix are clearly identifiable.

936 Part B: a  $\beta$ -hairpin from the VP3A Protein with its atomic model superimposed. The side chain densities  
937 stick out perpendicularly to the plane of the  $\beta$ -hairpin.

938 Part C: Structure of the VP6A protein. Cryo-EM Density (gray mesh) is Superimposed on its Atomic  
939 Model (magenta; only backbone is shown).

940 Part D: Structure of the guanylyltransferase domain of the VP1 Protein. CryoEM Density (gray mesh) is  
941 Superimposed with its Atomic Model (magenta sticks).

942

943 **Movie S3.** Structure of the Membrane Penetration Protein VP5, related to Figure 4. Cryo-EM density  
944 (gray mesh) is superimposed with its atomic model (magenta; only backbone is shown). Asn42 (red ball)  
945 and Pro43 (green ball) are indicated, and the myristoyl group is represented by a string of red balls.

946

947 **Movie S4.** Atomic Model of a VP5 Trimer Shown as Ribbon Models, related to Figure 5. Atomic model  
948 of a VP5 trimer shown as ribbon models with each monomer color-coded differently (green, magenta,  
949 and blue). The myristoyl groups are represented by strings of red balls, and Asn42 and Pro43 are  
950 indicated by a red ball and a green ball, respectively.

951
